# Supplementary material for: A Persian Validation of the Occupational Depression Inventory
Source: Atypon-hosted journal article supplement (doi:10.1027/1015-5759/a000830), 2024-04-15
Supplement: 1015-5759_a000830_esm1.pdf [file 1015-5759_a000830_esm1.pdf]

## سیاهه افسردگی شغلی (ODI)

### دستورالعمل های اولیه برای پاسخ دهندگان

عبارات زیر مربوط به تأثیری است که کار شما می تواند بر شما داشته باشد.

لطفاً هر جمله را بخوانید و مشخص کنید که چند بار مشکلات ذکر شده را در دو هفته گذشته تجربه کرده اید. از مقیاس ارائه شده برای پاسخ استفاده کنید:

0 = هرگز یا تقریباً هرگز

1 = فقط چند روز

2 = بیشتر از نیمی از روزها

3 = تقریباً هر روز

به عنوان مثال:

"من به خاطر شغلم احساس اضطراب می کردم."

- اگر به خاطر شغل خود احساس اضطراب نکردید، 0 را انتخاب کنید.
- اگر به دلایلی که به نظر شما به شغلان مرتبط نیست (مشکلات شخصی، مشکلات زناشویی، مشکلات خانوادگی، مشکلات سلامتی و غیره) احساس اضطراب کردید، 0 را انتخاب کنید.
- اگر احساس اضطراب کردید اما دلیل آن را نمی دانید، دوباره 0 را انتخاب کنید.
- اگر برای شما واضح است که شغل شما باعث ایجاد احساس اضطراب در شما شده است، 1، 2 یا 3 را انتخاب کنید تا نشان دهید چند بار این اتفاق افتاده است.

اکنون می توانید پرسشنامه را تکمیل کنید.

## سیاهه افسردگی شغلی (ODI)

تاریخ:

نام مراجع: .....

.....

| تقریباً هر روز | بیشتر از<br>نیمی از<br>روزها | فقط چند روز | هرگز یا<br>تقریباً هرگز | مشخص کنید که در دو هفته گذشته چند بار مشکلات ذکر شده ی زیر را تجربه کرده اید.                                                                                               |
|----------------|------------------------------|-------------|-------------------------|-----------------------------------------------------------------------------------------------------------------------------------------------------------------------------|
| 3              | 2                            | 1           | 0                       | 1. کار من آنقدر استرس زا بود که نمی توانستم از کارهایی که معمولاً دوست دارم انجام دهم، لذت ببرم.                                                                            |
| 3              | 2                            | 1           | 0                       | 2. به خاطر شغلم احساس افسردگی می کردم.                                                                                                                                      |
| 3              | 2                            | 1           | 0                       | 3. استرس شغلی من باعث شد که مشکلات خواب داشته باشم (در به خواب رفتن یا تداوم خواب مشکل داشتم یا خیلی بیشتر از حد معمول می خوابیدم).                                         |
| 3              | 2                            | 1           | 0                       | 4. من به خاطر کارم احساس خستگی مفرط می کردم.                                                                                                                                |
| 3              | 2                            | 1           | 0                       | 5. احساس کردم اشتهایم به خاطر استرس شغلی ام به هم ریخته است (اشتهایم را از دست دادم یا برعکس، زیاد غذا می خورم).                                                            |
| 3              | 2                            | 1           | 0                       | 6. تجربه من در کار باعث شد احساس کنم شکست خورده ام.                                                                                                                         |
| 3              | 2                            | 1           | 0                       | 7. شغلم آنقدر به من استرس وارد می کرد که در تمرکز بر روی کاری که انجام می دادم (مثلاً خواندن مقاله ای در روزنامه) یا در هوشمندانانه فکر کردن (مثلاً تصمیم گیری) مشکل داشتم. |
| 3              | 2                            | 1           | 0                       | 8. به علت استرس شغلی، احساس بی قراری می کردم و یا برعکس به طور چشمگیری کند شده بودم (مثلاً در نحوه ی حرکت یا صحبت کردن).                                                    |
| 3              | 2                            | 1           | 0                       | 9. فکر می کردم ترجیح می دهم بمیرم تا این که به این شغل ادامه دهم.                                                                                                           |

نمره کل: .....

اگر حداقل با برخی از مشکلات ذکر شده در بالا مواجه شده اید، آیا این مشکلات باعث می شود که شغل یا موقعیت فعلی خود را ترک کنید؟

بله  نه  نمی دانم

## **Occupational Depression Inventory: SPSS syntax for a provisional diagnosis of occupational depression**

```
compute DEP = 0.  
do if ODI1 ge 3 or ODI2 ge 3.  
count DEP = ODI3 (3)  
ODI4 (3)  
ODI5 (3)  
ODI6 (3)  
ODI7 (3)  
ODI8 (3)  
ODI9 (1,2,3).  
end if.
```

```
if ODI1 ge 3 DEP = DEP + 1.  
if ODI2 ge 3 DEP = DEP + 1.
```

```
compute DIAG = 0.  
if DEP ge 5 DIAG = 1.
```

*Note.* The nine items of the Occupational Depression Inventory are coded ODI1 to ODI9.

### Items

ODI1: anhedonia

ODI2: depressed mood

ODI3: sleep alterations

ODI4: fatigue/loss of energy

ODI5: appetite alterations

ODI6: feelings of worthlessness

ODI7: cognitive impairment

ODI8: psychomotor alterations

ODI9: suicidal ideation

**Supplemental Table E1.** Descriptive statistics for the items of the Occupational Depression Inventory.

| Indicators                    | ODI1   | ODI2  | ODI3   | ODI4   | ODI5  | ODI6  | ODI7  | ODI8  | ODI9  |
|-------------------------------|--------|-------|--------|--------|-------|-------|-------|-------|-------|
| Mean                          | 0.955  | 0.659 | 0.879  | 1.096  | 0.724 | 0.493 | 0.625 | 0.524 | 0.251 |
| Median                        | 1      | 0     | 1      | 1      | 0     | 0     | 0     | 0     | 0     |
| Mode                          | 1      | 0     | 0      | 1      | 0     | 0     | 0     | 0     | 0     |
| Standard deviation            | 0.901  | 0.898 | 0.920  | 0.949  | 0.907 | 0.753 | 0.846 | 0.764 | 0.630 |
| Skewness ( <i>SE</i> = 0.129) | 0.602  | 1.172 | 0.855  | 0.466  | 1.031 | 1.581 | 1.307 | 1.468 | 2.807 |
| Kurtosis ( <i>SE</i> = 0.258) | -0.511 | 0.321 | -0.108 | -0.734 | 0.043 | 2.093 | 0.995 | 1.687 | 7.748 |
| Minimum                       | 0      | 0     | 0      | 0      | 0     | 0     | 0     | 0     | 0     |
| Maximum                       | 3      | 3     | 3      | 3      | 3     | 3     | 3     | 3     | 3     |

*Notes.* *SE* = standard error; ODI1: anhedonia; ODI2: depressed mood; ODI3: sleep alterations; ODI4: fatigue/loss of energy; ODI5: appetite alterations; ODI6: feelings of worthlessness; ODI7: cognitive impairment; ODI8: psychomotor alterations; ODI9: suicidal ideation. No missing values.

**Supplemental Table E2.** Summary of measurement invariance analysis.

|                   | $\chi^2$ | <i>df</i> | CFI   | $\Delta$ CFI | SRMR  | $\Delta$ SRMR |
|-------------------|----------|-----------|-------|--------------|-------|---------------|
| <b>Analysis 1</b> |          |           |       |              |       |               |
| Configural model  | 710.941  | 108       | 0.987 | —            | 0.035 | —             |
| Metric model      | 808.896  | 132       | 0.986 | -0.001       | 0.038 | 0.003         |
| Scalar model      | 1009.295 | 183       | 0.983 | -0.003       | 0.042 | 0.004         |
| <b>Analysis 2</b> |          |           |       |              |       |               |
| Configural model  | 662.287  | 54        | 0.987 | —            | 0.034 | —             |
| Metric model      | 693.734  | 62        | 0.986 | -0.001       | 0.036 | 0.002         |
| Scalar model      | 770.470  | 79        | 0.985 | -0.001       | 0.039 | 0.003         |

*Notes.* The analyses involved four samples. The first three samples were the samples with which the Occupational Depression Inventory was initially validated (Bianchi & Schonfeld, 2020). The fourth sample was our Iranian sample (*N* = 355). In Analysis 1, all samples were considered separately (i.e., four samples were considered); in Analysis 2, the first three samples were combined (i.e., two samples were eventually considered). These two different configurations were tested because the original validation study of the ODI approached its three samples not only separately but also in combination. CFI: Comparative Fit Index;  $\Delta$ CFI: delta (change in) CFI; SRMR: Standardized Root Mean Squared Residual;  $\Delta$ SRMR: delta (change in) SRMR; *df*: degrees of freedom.
